# Supplementary material
Source: Research Square preprint supplement (doi:10.21203/rs.3.rs-8369606/v1)
Supplement: Supplementary file 1 [file fbe8da7acd2e943eb84bc778.docx]

**Supplementary Information**

**
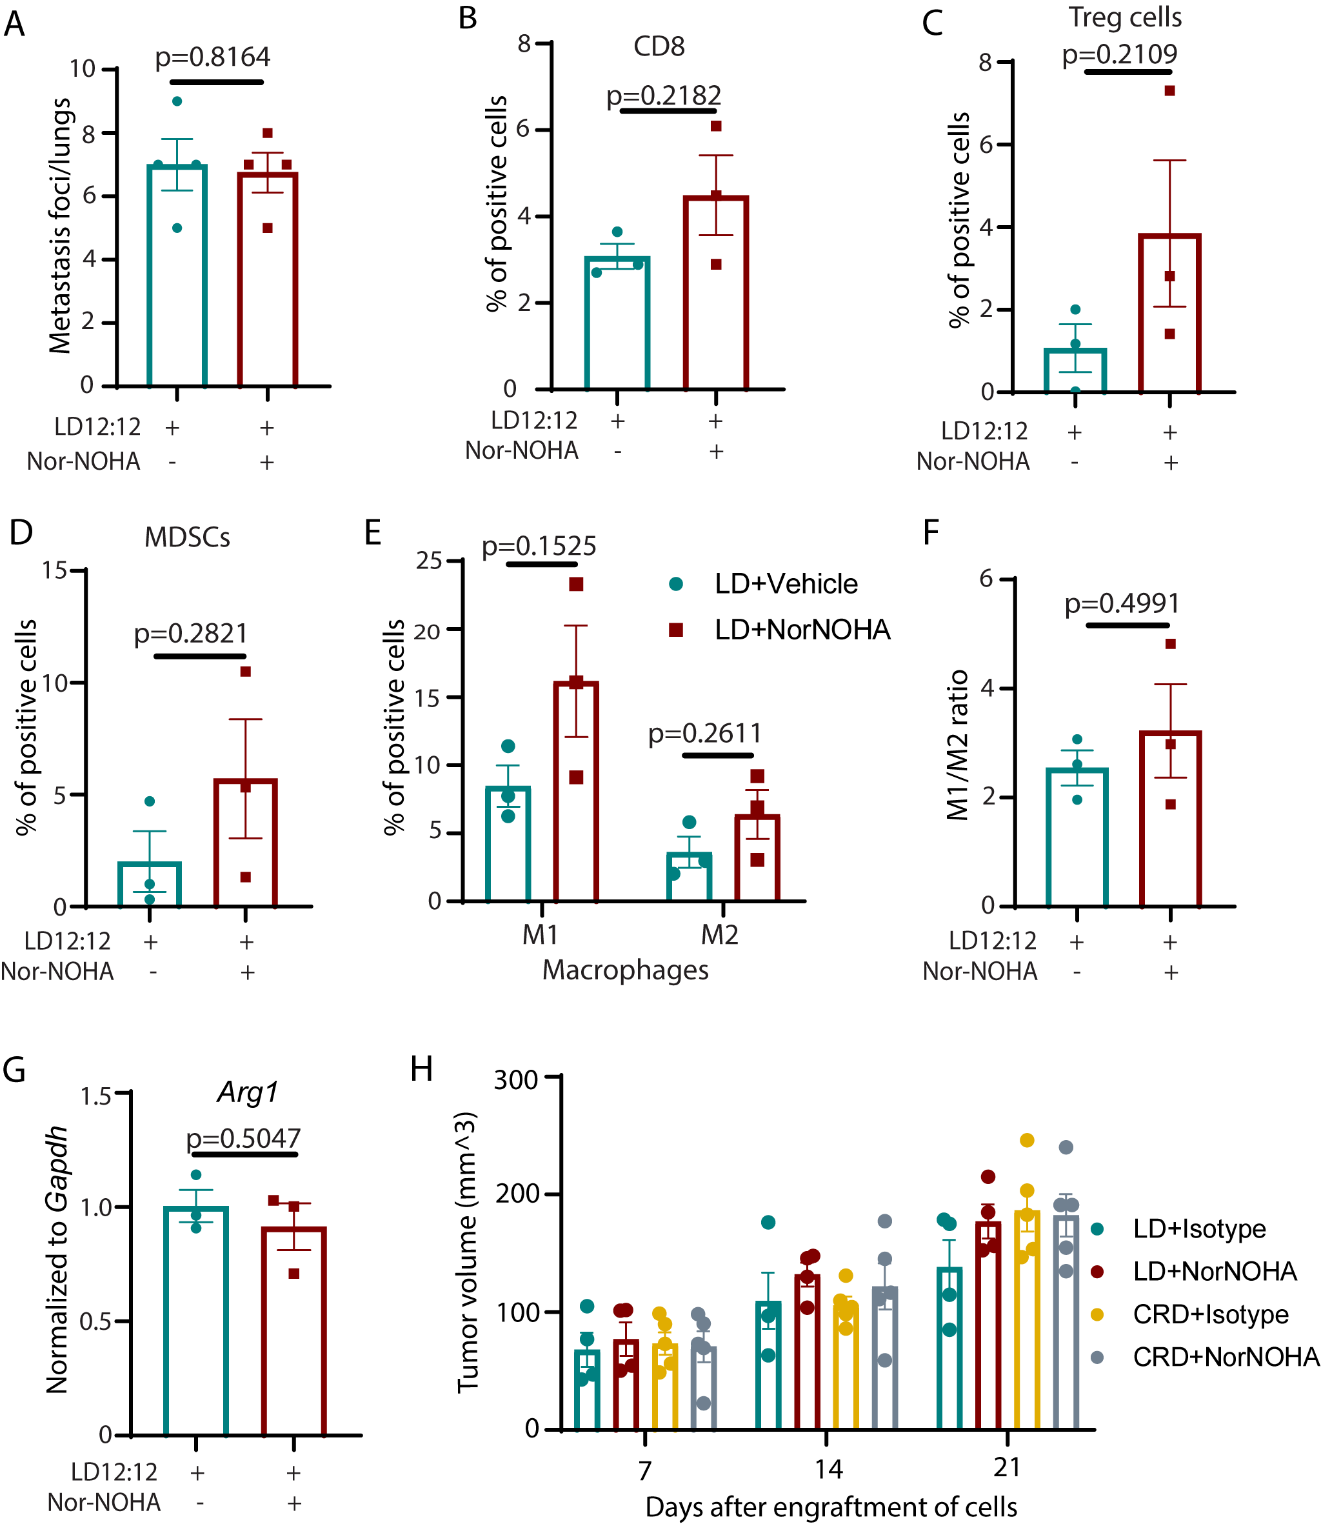
**

**Figure S1. Arginase 1 inhibition in LD-induced tumors. (A)** Themetastasis foci to the lungs of nor-NOHA LD-treated mice (n=4). The number of positive cells for CD8 **(B)**, Treg **(C),** and MDSCs **(D)** in nor-NOHA LD-treated mice compared to LD (control). M1 and M2 macrophage populations are shown in **E**. The M1/M2 ratio in LD-induced tumors treated with nor-NOHA **(F)**. *Arg1* transcript level showed no changes in LD tumors **(G)** (n=3). **(H)** Tumor volumes showed no differences across all treated groups in LD and CRD conditions. Data presented as mean ± SEM; **p* < 0.05, ***p* < 0.01, ****p* < 0.001, *****p* < 0.0001 represents the significance level from an unpaired t-test

**Figure S2. Flow Cytometry Gating Strategy.** The gating strategy is used to determine CD45 and Treg (FOXP3+ cells) **(A),** M1 and M2 macrophages **(B),** and MDSCs **(C)** (sample size n=5).


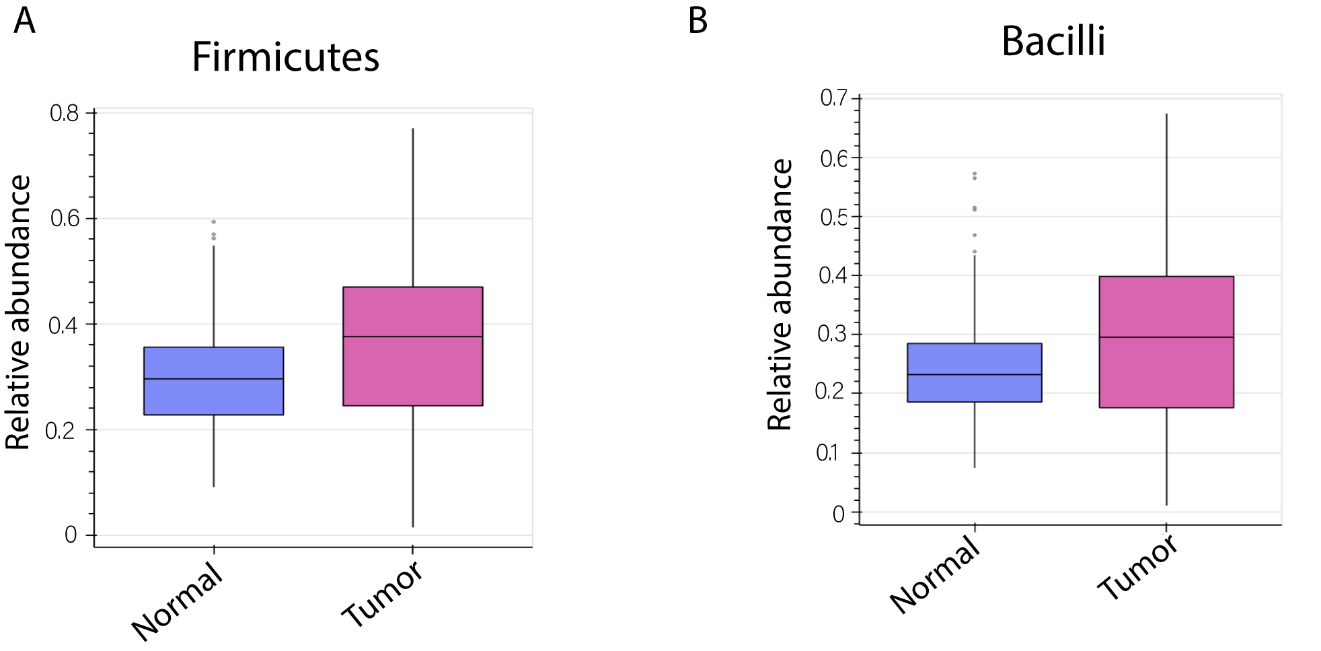
**Figure S3. The microbiome profile is altered in human patients.** Analysis of the Bacteria in Cancer (BIC) database revealed that Firmicutes **(A)**, and Bacilli **(B)** abundance was significantly higher in human breast tumors relative to adjacent normal tissues.


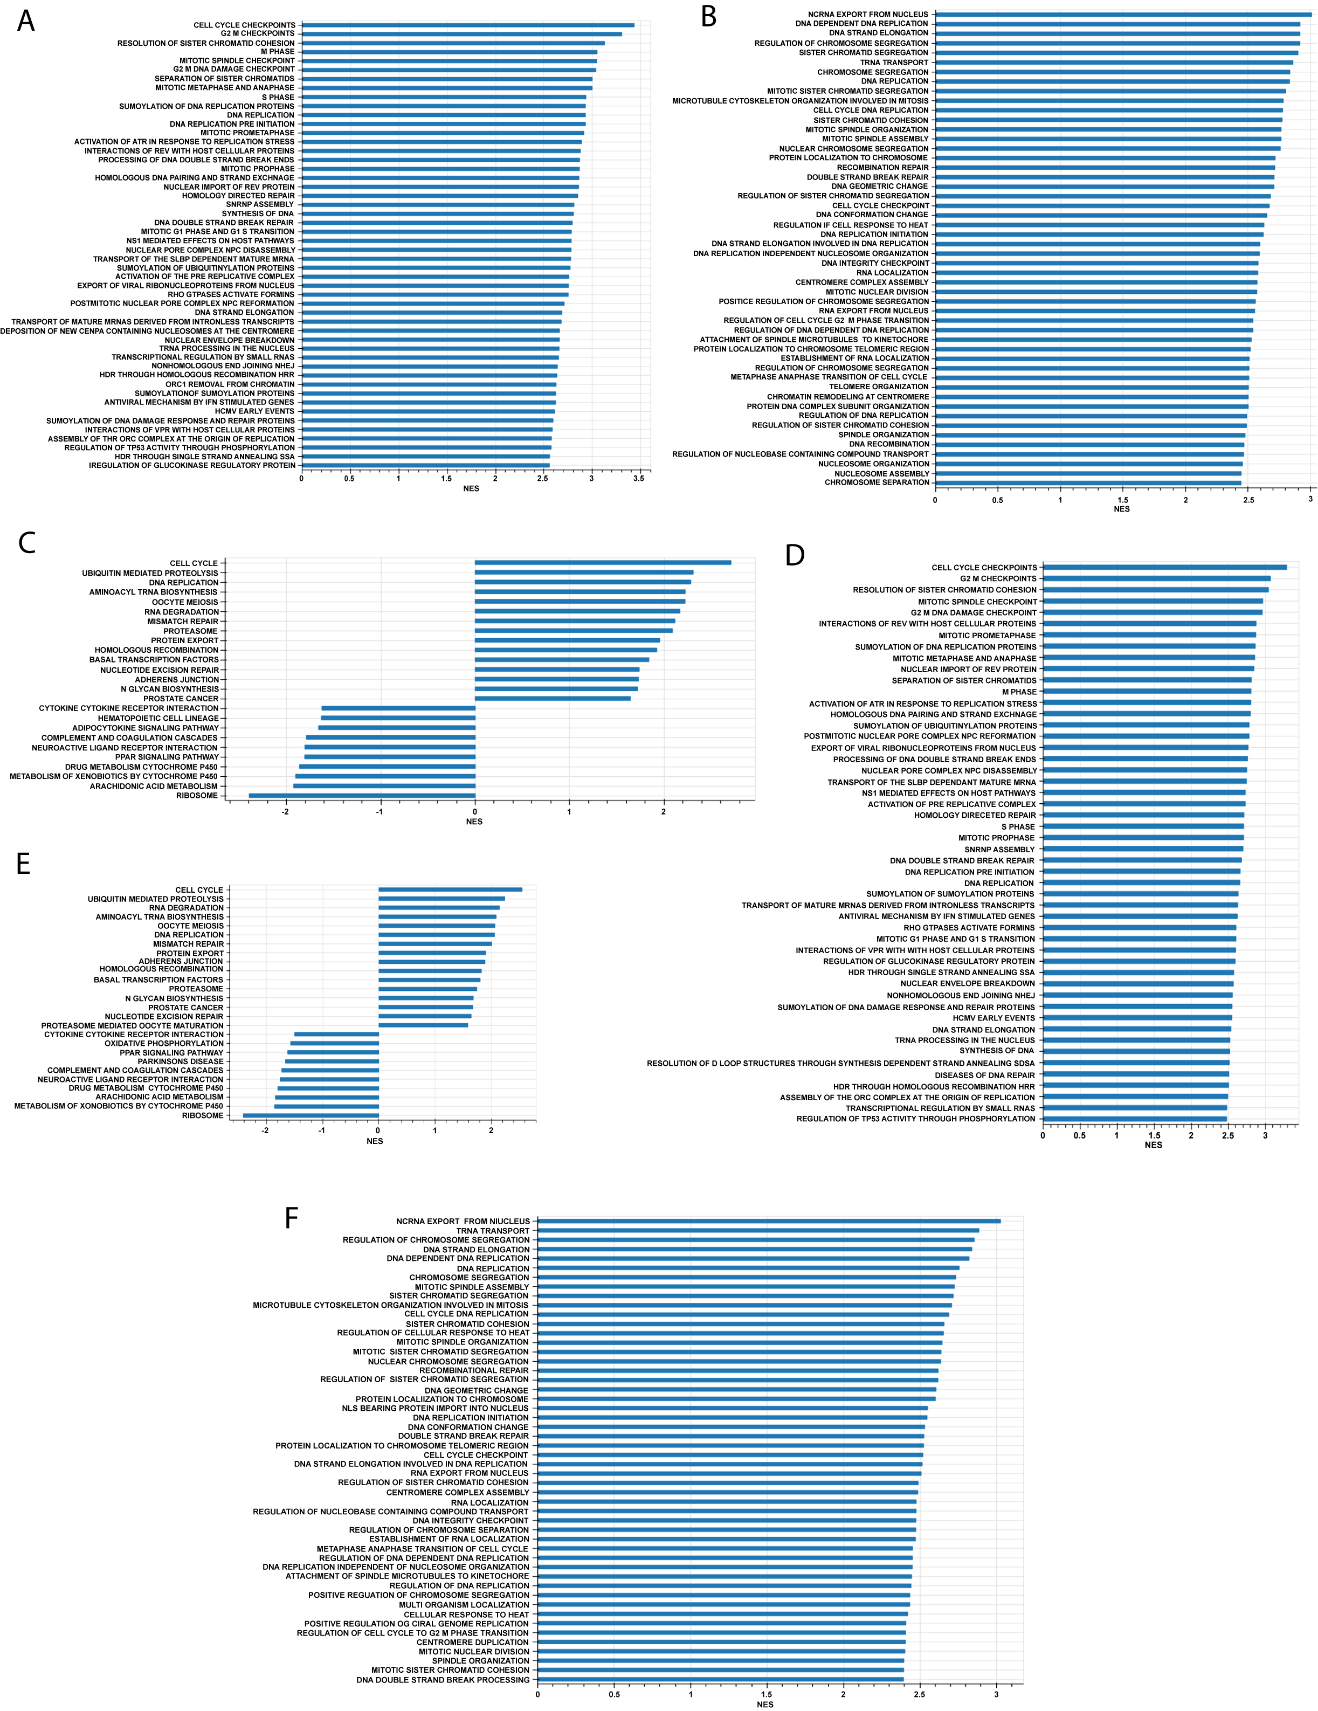


**Figure S4. Bacteria-associated biological function.** The charts represent the biological function of the input bacteria, taxonomy and cancer type using the Bacteria in Cancer (BIC) database.Reactome pathway **(A)**, gene ontology **(B)**, and KEGG analysis **(C)** of Firmicutes. Reactome pathway **(D)**, KEGG analysis **(E),** and gene ontology **(F)** for Bacilli.

| **Supplementary Table 1:** Key CRD-associated metabolites, their metabolic pathways, and immunological impacts contributing to tumor immune evasion | | | |
| --- | --- | --- | --- |
| **Metabolite** | **Pathway** | **Key Effect** | **Immunological Impact** |
| **Kynurenic acid (KA)** | Tryptophan–kynurenine | AHR activation | ↓ T-cell proliferation and activation; immune evasion |
| **Xanthurenic acid (XA)** | Tryptophan–kynurenine | AHR activation | ↓ Dendritic cell maturation and T-cell priming |
| **Adenosine** | Purine metabolism | A2A/A2B receptor signaling | ↓ Cytotoxic T cells; ↑ Tregs; ↑ M2 macrophage polarization |
| **Lactic acid** | Glycolysis | HCAR1 → HIF-1α activation; histone lactylation | ↓ Cytotoxic T cells; ↓ NK cells; ↑ M2 macrophage polarization |
| **Spermidine / N-acetyl-spermidine** | Polyamine metabolism | ROS → AMPK → HIF-1α activation | ↓ T-cell activation; ↑ M2 macrophage polarization |
| **Argininosuccinic acid** | Arginine biosynthesis | L-arginine precursor → ARG1 activation | L-arginine depletion → ↓ T-cell function and proliferation |
| **D-galactose & Glucosamine ↓** | Glycosylation pathways | Loss of glycosylation substrates | Impaired TCR function and antigen presentation |
